# Supplementary material for: Validation of an IFNγ/IL2 FluoroSpot assay for clinical trial monitoring
Source: PubMed Central journal article supplement (PMC4906590; doi:10.1186/s12967-016-0932-7), 2016-06-14
Supplement: 12967_2016_932_MOESM1_ESM.pdf [file 12967_2016_932_MOESM1_ESM.pdf]

**Additional file 1: Table S1: Magnitude of background activity measured in unstimulated control wells<sup>a</sup>**

| Donor       | IFN $\gamma$ |             | IL2      |             | IFN $\gamma$ +IL2 |             |
|-------------|--------------|-------------|----------|-------------|-------------------|-------------|
|             | Mean         | SD          | Mean     | SD          | Mean              | SD          |
| S01         | 2            | 1.73        | 5        | 2.57        | 2                 | 0.00        |
| S02         | 3            | 4.93        | 4        | 4.49        | 1                 | 0.64        |
| S03         | 1            | 0.58        | 6        | 2.31        | 0                 | 0.64        |
| S04         | 0            | 0.58        | 5        | 2.80        | 1                 | 0.58        |
| S05         | 1            | 0.58        | 3        | 2.57        | 0                 | 0.00        |
| S06         | 1            | 1.13        | 7        | 3.21        | 0                 | 0.00        |
| S07         | 1            | 0.58        | 2        | 2.36        | 1                 | 0.58        |
| S08         | 2            | 1.30        | 10       | 3.72        | 0                 | 0.46        |
| S09         | 1            | 1.10        | 6        | 2.51        | 1                 | 0.73        |
| S10         | 2            | 1.59        | 3        | 1.55        | 0                 | 0.25        |
| S11         | 3            | 1.66        | 10       | 2.22        | 1                 | 0.78        |
| S12         | 1            | 1.23        | 5        | 2.11        | 0                 | 0.70        |
| S13         | 2            | 1.18        | 5        | 2.09        | 0                 | 0.25        |
| S14         | 4            | 2.56        | 3        | 3.39        | 1                 | 1.08        |
| S15         | 3            | 1.05        | 7        | 2.25        | 0                 | 0.27        |
| S16         | 2            | 1.21        | 8        | 3.02        | 1                 | 0.79        |
| S17         | 1            | 0.60        | 2        | 1.47        | 0                 | 0.27        |
| S18         | 2            | 2.14        | 9        | 2.95        | 1                 | 1.06        |
| S19         | 1            | 0.95        | 7        | 2.32        | 0                 | 0.53        |
| S20         | 2            | 1.58        | 9        | 2.78        | 0                 | 0.51        |
| S21         | 4            | 2.85        | 10       | 3.21        | 2                 | 1.31        |
| S22         | 1            | 0.88        | 7        | 3.16        | 0                 | 0.17        |
| S23         | 1            | 1.23        | 5        | 2.57        | 1                 | 0.58        |
| S24         | 1            | 0.64        | 1        | 0.43        | 0                 | 0.18        |
| S25         | 1            | 0.89        | 3        | 3.78        | 0                 | 0.19        |
| S26         | 1            | 1.18        | 3        | 2.04        | 0                 | 0.19        |
| S27         | 2            | 0.95        | 8        | 1.11        | 2                 | 2.22        |
| S28         | 3            | 2.52        | 3        | 3.57        | 1                 | 0.58        |
| S29         | 1            | 1.00        | 2        | 1.53        | 0                 | 0.00        |
| S30         | 1            | 0.58        | 1        | 1.92        | 1                 | 0.58        |
| <b>Mean</b> | <b>2</b>     | <b>1.37</b> | <b>5</b> | <b>2.53</b> | <b>1</b>          | <b>0.54</b> |

<sup>a</sup>Mean values are the mean number of detected IFN $\gamma$ , IL2 and IFN $\gamma$ +IL2 SFC/2x10<sup>5</sup> PBMC in unstimulated control wells where media was added instead of any stimulatory agent (in triplicates; mean numbers of SFC of all performed FluoroSpot assays of each donor); SD = standard deviation
