# Supplementary material for: Validation of an IFNγ/IL2 FluoroSpot assay for clinical trial monitoring
Source: PubMed Central journal article supplement (PMC4906590; doi:10.1186/s12967-016-0932-7), 2016-06-14
Supplement: 12967_2016_932_MOESM2_ESM.pdf [file 12967_2016_932_MOESM2_ESM.pdf]

**Additional file 2: Table S2A: Intra-assay variability of antigen-specific IFN $\gamma$  responses ranging between 1-10 SFC/well<sup>a</sup>**

| Donor       | Antigen | Replicate 1 | Replicate 2 | Replicate 3 | Mean | SD          | %CV          |
|-------------|---------|-------------|-------------|-------------|------|-------------|--------------|
| S12         | BZLF1   | 2           | 12          | 8           | 7    | 5.03        | 68.63        |
| S23         | BZLF1   | 11          | 6           | 3           | 7    | 4.04        | 60.62        |
| S28         | BZLF1   | 8           | 9           | 5           | 7    | 2.08        | 28.39        |
| S11         | EBNA3A  | 4           | 3           | 2           | 3    | 1.00        | 33.33        |
| S15         | EBNA3A  | 4           | 8           | 7           | 6    | 2.08        | 32.87        |
| S24         | EBNA3A  | 3           | 8           | 4           | 5    | 2.65        | 52.92        |
| S30         | EBNA3A  | 10          | 8           | 4           | 7    | 3.06        | 41.66        |
| <b>Mean</b> |         |             |             |             |      | <b>2.85</b> | <b>46.28</b> |

**Additional file 2: Table S2B: Intra-assay variability of antigen-specific IL2 responses ranging between 1-10 SFC/well<sup>a</sup>**

| Donor       | Antigen | Replicate 1 | Replicate 2 | Replicate 3 | Mean | SD          | %CV          |
|-------------|---------|-------------|-------------|-------------|------|-------------|--------------|
| S17         | EBNA3A  | 2           | 9           | 6           | 6    | 3.51        | 61.97        |
| S24         | EBNA3A  | 10          | 6           | 9           | 8    | 2.08        | 24.98        |
| <b>Mean</b> |         |             |             |             |      | <b>2.80</b> | <b>43.48</b> |

**Additional file 2: Table S2C: Intra-assay variability of antigen-specific IFN $\gamma$ +IL2 responses ranging between 1-10 SFC/well<sup>a</sup>**

| Donor       | Antigen | Replicate 1 | Replicate 2 | Replicate 3 | Mean | SD          | %CV          |
|-------------|---------|-------------|-------------|-------------|------|-------------|--------------|
| S12         | BZLF1   | 2           | 1           | 6           | 3    | 2.65        | 88.19        |
| S13         | BZLF1   | 2           | 7           | 5           | 5    | 2.52        | 53.93        |
| S24         | BZLF1   | 1           | 7           | 1           | 3    | 3.46        | 115.47       |
| S11         | EBNA3A  | 7           | 2           | 3           | 4    | 2.65        | 66.14        |
| S14         | EBNA3A  | 7           | 7           | 3           | 6    | 2.31        | 40.75        |
| S15         | EBNA3A  | 1           | 5           | 3           | 3    | 2.00        | 66.67        |
| S24         | EBNA3A  | 7           | 2           | 4           | 4    | 2.52        | 58.08        |
| <b>Mean</b> |         |             |             |             |      | <b>2.59</b> | <b>69.74</b> |

<sup>a</sup> Values represent the number of detected antigen-specific IFN $\gamma$  (table S2A), IL2 (table S2B), and IFN $\gamma$ +IL2 (table S2C) SFC/2x10<sup>5</sup> PBMC (stimulated with 1 $\mu$ g/ml BZLF1 or EBNA3A peptide pools) (data is not background subtracted) in the IFN $\gamma$ /IL2 FluoroSpot assay; SD = standard deviation. CV = coefficient of variation.
