# Supplementary material for: Validation of an IFNγ/IL2 FluoroSpot assay for clinical trial monitoring
Source: PubMed Central journal article supplement (PMC4906590; doi:10.1186/s12967-016-0932-7), 2016-06-14
Supplement: 12967_2016_932_MOESM4_ESM.pdf [file 12967_2016_932_MOESM4_ESM.pdf]

**Additional file 4: Table S4: Diagnostic specificity and sensitivity of the EBV-specific IFN $\gamma$ /IL2 FluoroSpot<sup>a</sup>**

| Donor         | EBV-serostatus | Antigen | Mean      | SD    | Antigen | Mean      | SD   |
|---------------|----------------|---------|-----------|-------|---------|-----------|------|
| S02           | negative       | BZLF1   | 0         | -     | EBNA3A  | 0         | -    |
| S03           | negative       | BZLF1   | 0         | -     | EBNA3A  | 0         | -    |
| S04           | negative       | BZLF1   | 0         | -     | EBNA3A  | 0         | -    |
| S05           | negative       | BZLF1   | 0         | -     | EBNA3A  | 0         | -    |
| S06           | negative       | BZLF1   | 0         | -     | EBNA3A  | 0         | -    |
| S07           | negative       | BZLF1   | 0         | -     | EBNA3A  | 0         | -    |
| S01           | positive       | BZLF1   | 117       | 4.51  | EBNA3A  | 54        | 7.54 |
| S08           | positive       | BZLF1   | 90        | 5.57  | EBNA3A  | 12        | 1.53 |
| S09           | positive       | BZLF1   | 274       | 16.27 | EBNA3A  | 35        | 4.73 |
| S10           | positive       | BZLF1   | 18        | 1.73  | EBNA3A  | 42        | 3.06 |
| S11           | positive       | BZLF1   | 411       | 10.31 | EBNA3A  | 0         | -    |
| S12           | positive       | BZLF1   | 0         | -     | EBNA3A  | 102       | 2.59 |
| S13           | positive       | BZLF1   | 0         | -     | EBNA3A  | 64        | 1.41 |
| S14           | positive       | BZLF1   | 366       | 11.92 | EBNA3A  | 0         | -    |
| S15           | positive       | BZLF1   | 84        | 4.36  | EBNA3A  | 0         | -    |
| S16           | positive       | BZLF1   | 276       | 2.31  | EBNA3A  | 29        | 4.93 |
| S17           | positive       | BZLF1   | 26        | 3.79  | EBNA3A  | 0         | -    |
| S18           | positive       | BZLF1   | 194       | 12.57 | EBNA3A  | 16        | 2.52 |
| S19           | positive       | BZLF1   | 67        | 6.81  | EBNA3A  | 118       | 4.04 |
| S20           | positive       | BZLF1   | 60        | 4.58  | EBNA3A  | 65        | 8.48 |
| S21           | positive       | BZLF1   | 0         | -     | EBNA3A  | 167       | 7.02 |
| S24           | positive       | BZLF1   | 11        | 4.04  | EBNA3A  | 0         | -    |
| <b>Median</b> |                |         | <b>90</b> |       |         | <b>54</b> |      |

<sup>a</sup> Illustrated is the total response (sum of IFN $\gamma$ , IL2, and IFN $\gamma$ +IL2 SFC/2x10<sup>5</sup> PBMC) of EBV-seropositive donors detected during the validation experiments (stimulated with 1 $\mu$ g/ml BZLF1 or EBNA3A peptide pools). Mean values are the mean number of antigen-specific total responses of each donor of all performed IFN $\gamma$ /IL2 FluoroSpot assays; SD = standard deviation.
